# Supplementary material
Source: PubMed Central journal article supplement (PMC5886428)
Supplement: jcsm.14.4.511s1.pdf [file jcsm.14.4.511s1.pdf]

**Table S1**—Demographic and Clinical Details of patients who consented to participate in the study.

| <b>Variables</b>                                                 | <b>Patient who Consented<br/>(n = 354)</b> | <b>Patients who Underwent<br/>Polysomnography (n=116)</b> |
|------------------------------------------------------------------|--------------------------------------------|-----------------------------------------------------------|
| Age                                                              | 54.22± 12.01                               | 54.58±12.73                                               |
| Sex (Male)                                                       | 278(78.53)                                 | 92(79.31)                                                 |
| BMI                                                              | 25.81±3.21                                 | 26.55±6.1                                                 |
| HTN                                                              | 210 (59.32)                                | 72(62.93)                                                 |
| H/o CAD                                                          | 27 (7.63)                                  | 14(12.07)                                                 |
| DM                                                               | 98 (27.68)                                 | 23(19.82)                                                 |
| H/o Smoking                                                      | 152 (42.94)                                | 43(37.07)                                                 |
| Dyslipidemia                                                     | 102 (28.81)                                | 45(38.79)                                                 |
| BQ (High risk of OSA)                                            | 210 (59.32)                                | 68(58.62)                                                 |
| ESS(>10)*                                                        | 78 (23.93)                                 | 34(29.82)                                                 |
| ESS                                                              | 5.43±5.4<br>6 (0-22)                       | 5.58±4.98<br>6 (0-22)                                     |
| * ESS is not available for all patients RR (325/354 vs 114/116). |                                            |                                                           |

**Table S2**—CPAP Compliance (n=30).

| <b>Characteristic</b>                   | <b>Mean <math>\pm</math>SD<br/>Median(Range)</b> |
|-----------------------------------------|--------------------------------------------------|
| <b>Compliance</b>                       |                                                  |
| Use (Hr/night)                          | 4.2 $\pm$ 1.32<br>4.5(3.4-6.6)                   |
| % of Nights, on which CPAP used         | 76 $\pm$ 22.87<br>71(52-96)                      |
| % of Nights, on which CPAP used > 4 hrs | 58.92 $\pm$ 19.97<br>50(30-96)                   |
| <b>Efficacy</b>                         |                                                  |
| AHI                                     | 1.65 $\pm$ 0.97<br>1.4(0-3.9)                    |
| Mask Leak (L/s)                         | 0.38 $\pm$ 1.8<br>0.43(0.22-3.78)                |

**Table S3**—Problems reported by patients with stroke using CPAP on nightly basis, and the solutions offered thereto.

| <b>Problem</b>                                                               | <b>Steps Taken</b>                                                                                       |
|------------------------------------------------------------------------------|----------------------------------------------------------------------------------------------------------|
| Patients returned device due to inability to tolerate/accept.                | Patients and caregivers counseled and patient acclimation to CPAP ensured                                |
| Lack of understanding of utility of PAP device.                              | Repeated education and counseling sessions                                                               |
| Using machine irregularly (reported by caregivers)                           | Daily telephonic counseling for variable periods to motivate and support patient to use device regularly |
| Dry mouth                                                                    | Advised to use humidifier / asked to use oronasal instead of nasal mask                                  |
| Anxiety in using device                                                      | Patients desensitized.                                                                                   |
| Patient removed machine during sleep, and had difficulty to put it on again. | Mask application inspected, corrected → no further compliance issues                                     |
| Aerophagia                                                                   | Improved by decreasing pressure, and advice regarding timing of dinner earlier than their usual          |
| Poorly fitting mask                                                          | Mask changed                                                                                             |
| Frequent power cuts at patient's home                                        | Suggested to connect device to uninterrupted power supply battery device                                 |

**Figure S1**—Kaplan-Meier Survival estimates analysis.

## Kaplan-Meier survival estimation of stroke patients with OSA according to CPAP treatment.

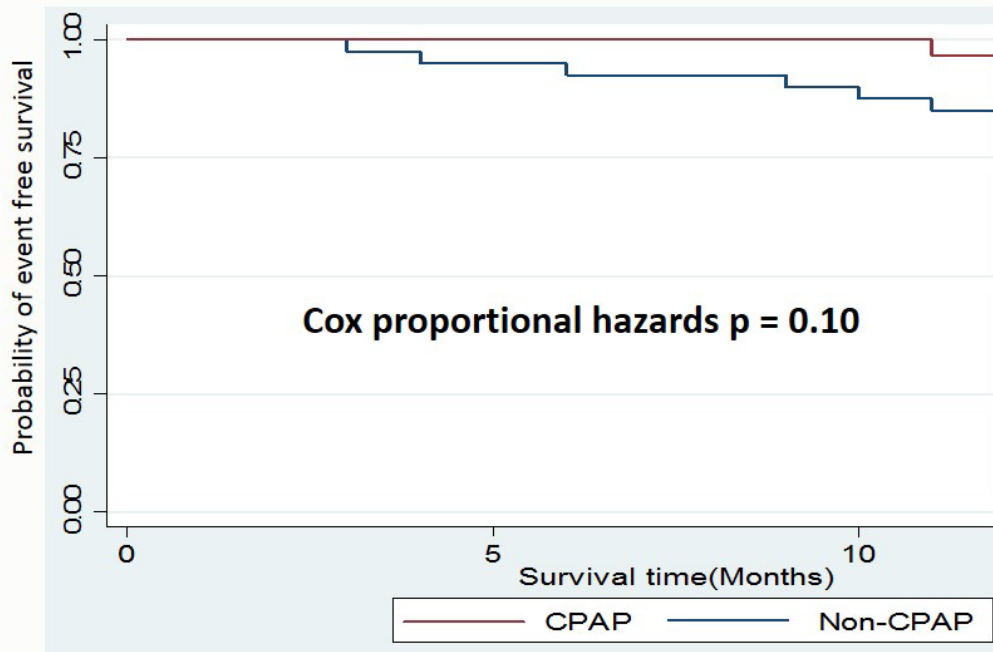

The overall cardiovascular event free survival rate after 12 months was 96.66 % (1 out of 30 subjects) in the n CPAP group and 85 % (34 out of 40 subjects) in the control group (log-rank test 1.44 ;  $p = 0.23$  ).

On multifactorial Cox proportional hazards regression analysis of factors associated with cardiovascular events or mortality at follow up, no variables (age sex, BMI, history of hypertension, ischaemic heart disease, smoking, dyslipidaemia, Epworth Sleepiness scale, Barthel index, modified Rankin scale, AHI) were associated with a higher risk in the non-CPAP group (hazard ratio 0.31 , 95% CI 0.27 - 3.47 ,  $p = 0.10$ ).
